# Supplementary material for: Exploring sustainable care pathways.
Source: Research Square preprint supplement (doi:10.21203/rs.3.rs-1649821/v1), 2022-05-18
Supplement: Supplementary file 1 [file fb75ce0cb9c3e83d1664398c.docx]

CASP´s ten questions: Quality assessment for review design (qualitative and quantitative)

| Casp Assessment  Ten questions | 1 | 2 | 3 | 4 | 5 | 6 | 7 | 8 | 9 | 10 | Bias  descriptions |
| --- | --- | --- | --- | --- | --- | --- | --- | --- | --- | --- | --- |
| Allen et al (2009) | 1 | 1 | 3 | 3 | 3 | 7 | 1 | 0 | 3 | 1 | Yes |
| Amaral et al (2018) | 1 | 1 | 1 | 1 | 1 | 25 | 1 | 0 | 1 | 1 | No |
| Anderson et al (2010) | 1 | 1 | 1 | 1 | 1 | 30 | 3 | 0 | 1 | 1 | No |
| Chen et al (2015) | 1 | 1 | 3 | 3 | 3 | 13 | 1 | 1 | 1 | 1 | No |
| Deneckere et al (2012) | 1 | 1 | 3 | 3 | 1 | 26 | 1 | 1 | 1 | 1 | No |
| Durbin et al (2012) | 1 | 1 | 1 | 1 | 1 | 32 | 1 | 1 | 1 | 1 | Yes |
| Doody et al (2017) | 1 | 1 | 1 | 1 | 3 | 15 | 1 | 1 | 1 | 1 | Yes |
| Gronholm et al (2017) | 1 | 1 | 1 | 1 | 3 | 32 | 3 | 1 | 3 | 1 | Yes |
| Mutschler et al (2019) | 1 | 1 | 1 | 1 | 1 | 27 | 1 | 1 | 1 | 1 | No |
| Neame et al (2019) | 1 | 1 | 1 | 3 | 1 | 44 | 1 | 1 | 3 | 1 | Yes |
| Rotter et al (2010) | 1 | 1 | 1 | 1 | 1 | 28 | 1 | 1 | 1 | 1 | Yes |
| Storm et al (2019) | 1 | 1 | 3 | 3 | 1 | 16 | 1 | 1 | 3 | 1 | Yes |
| Viggiano et al (2012) | 1 | 1 | 1 | 3 | 3 | 9 | 2 | 1 | 1 | 1 | No |
| Vigod et al (2013) | 1 | 1 | 3 | 3 | 1 | 15 | 1 | 1 | 1 | 1 | Yes |
| Volpe et al (2015) | 1 | 1 | 1 | 1 | 1 | 34 | 1 | 1 | 1 | 1 | No |
| Allan et al (2020) | 1 | 1 | 1 | 1 | 1 | 10 | 1 | 1 | 1 | 1 | Yes |

0-no, 1-yes, 3-can´t tell

6: Number of articles included in the study 7: 1-precise, 2-not precise, 3-I don´t know.

1: Did the review address a clearly focused question? 2: Did the authors look for the right type of papers? 3: Do you think all the important, relevant studies were included? 4: Did the review’s authors do enough to assess quality of the included studies? 5: If the results of the review have been combined, was it reasonable to do so? 6: What are the overall results of the review? 7: How precise are the results? 8: Can the results be applied to the local population? 9: Were all important outcomes considered? 10: Are the benefits worth the harms and costs?

CASP´s ten questions: Quality assessment for quantitative & qualitative design

| Casp Assessment | 1 | 2 | 3 | 4 | 5 | 6 | 7 | 8 | 9 | 10 | Bias  Descriptions |
| --- | --- | --- | --- | --- | --- | --- | --- | --- | --- | --- | --- |
| Akershurst et al (2018) a | 1 | 1 | 1 | 1 | 1 | 3 | 1 | 1 | 1 | 1 | No |
| Biringer et al (2017) b | 2 | 1 | 1 | 3 | 1 | 1 | 1 | 1 | 1 | 1 | Yes |
| Khandaker et al (2013) c | 1 | 1 | 1 | 1 | 1 | 3 | 1 | 1 | 1 | 1 | No |
| Seys et al (2017) b | 2 | 1 | 1 | 1 | 1 | 1 | 1 | 1 | 1 | 1 | Yes |
| Sather et al (2016) c | 1 | 1 | 1 | 1 | 1 | 1 | 1 | 1 | 1 | 1 | No |
| Sather et al (2018) c | 1 | 1 | 1 | 1 | 1 | 1 | 1 | 1 | 1 | 1 | Yes |
| Sather et al (2019) c | 1 | 1 | 1 | 1 | 1 | 1 | 1 | 1 | 1 | 1 | Yes |
| Steinacher et al (2012) b | 1 | 1 | 1 | 1 | 1 | 1 | 1 | 1 | 1 | 1 | Yes |
| Van Houdt et al (2013) a | 1 | 1 | 1 | 1 | 1 | 3 | 3 | 1 | 1 | 2 | No |
| Wright et al (2016) c | 1 | 1 | 1 | 1 | 1 | 1 | 1 | 1 | 1 | 1 | Yes |
| Hasson-Ohayon et al, (2016) c | 1 | 1 | 1 | 1 | 1 | 1 | 2 | 1 | 1 | 1 | No |
|  |  |  |  |  |  |  |  |  |  |  |  |
| Teshager et al., (2020) b | 2 | 2 | 2 | 2 | 3 | 1 | 1 | 1 | 1 | 1 | Yes |

a. mixt method (10 questions), b quantitative research (10 questions), c qualitative research (10 questions).

1-exact, 2-second best, 3-I don’t know.

Assessment questions on qualitative research designs:

1:Was there a clear statement of the research; 2: Is a qualitative methodology appropriate; 3: Was the research design appropriate to address the aims of the research; 4: Was the recruitment strategy appropriate to the aims of the research;5: Was the data collected in a way that addressed the research issue; 6: Has the relationship between researcher and participants been adequately considered; 7: Have ethical issues been taken into consideration; 8: Was the data analysis sufficiently rigorous; 9: Is there a clear statement of findings; 10: How valuable is the research?

Quality questions on quantitative research designs:

1: **Did the study ask a clearly focused question?** 2: **Was this a randomized controlled trial (RCT) and was it appropriately so?** 3: **Were participants appropriately allocated to intervention and control groups?** 4: **Were participants, staff and study personnel ‘blind’ to participants’ study group?** 5: **Were all the participants who entered the trial accounted for at its conclusion?** 6: W**ere the participants in all groups followed up and data collected in the same way?** 7: **Did the study have enough participants to minimize the play of chance?** 8: **How are the results presented and what is the main result and.9: How precise are these results? 10: Were all important outcomes considered so the results can be applied?**

- Yes: score 1
- No: score of 0
- Can’t tell score of 3
